# Supplementary material for: The GSK3β/Mcl-1 axis is regulated by both FLT3-ITD and Axl and determines the apoptosis induction abilities of FLT3-ITD inhibitors
Source: PubMed Central journal article supplement (PMC9899255; doi:10.1038/s41420-023-01317-0), 2023-02-04

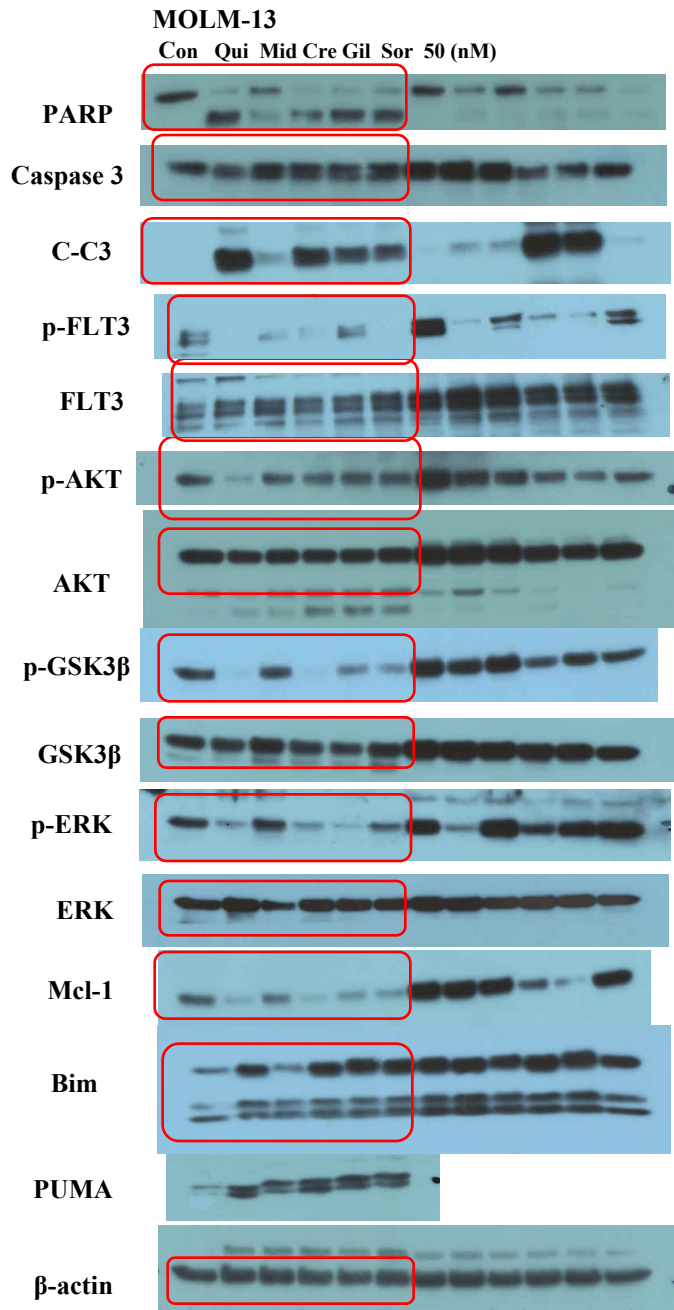

**Fig.1C**

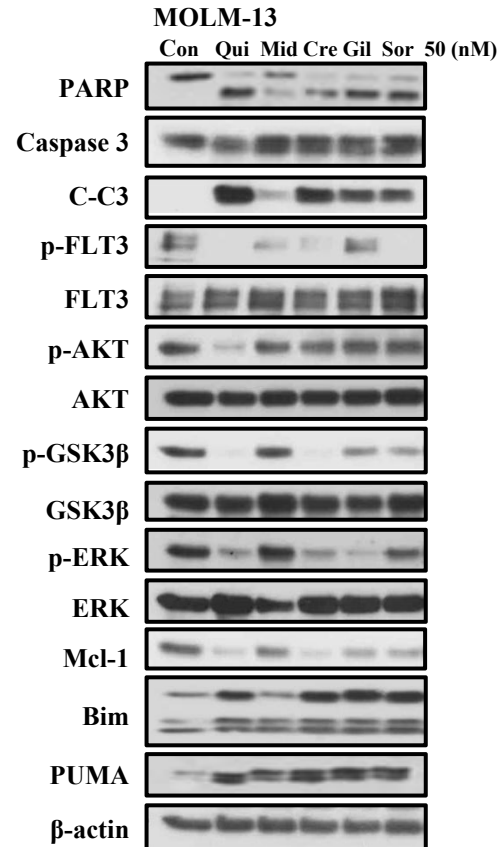

**Fig.1C**

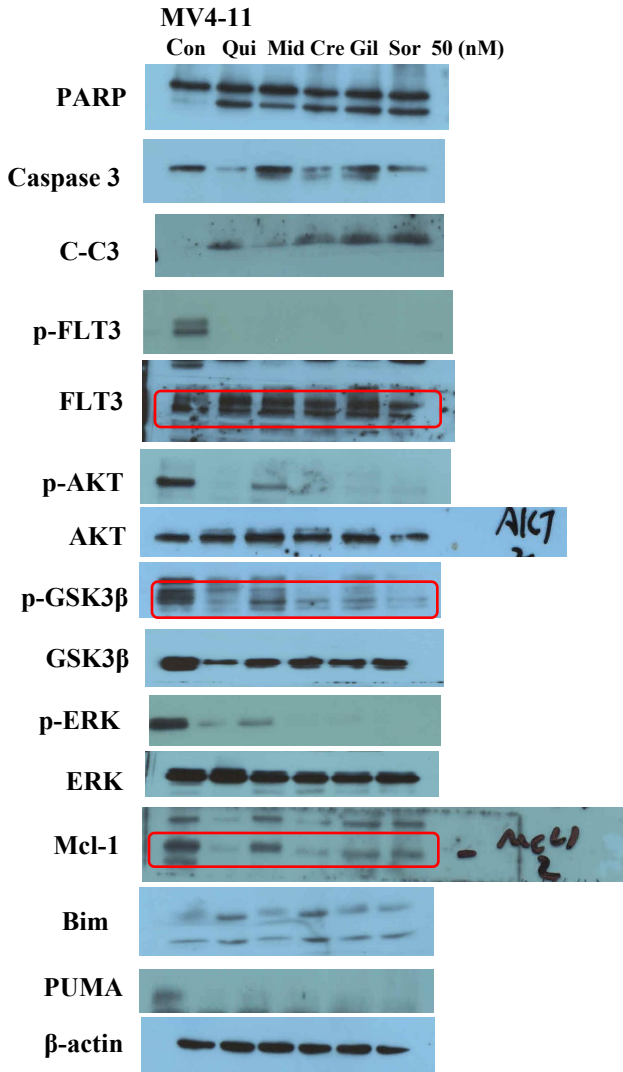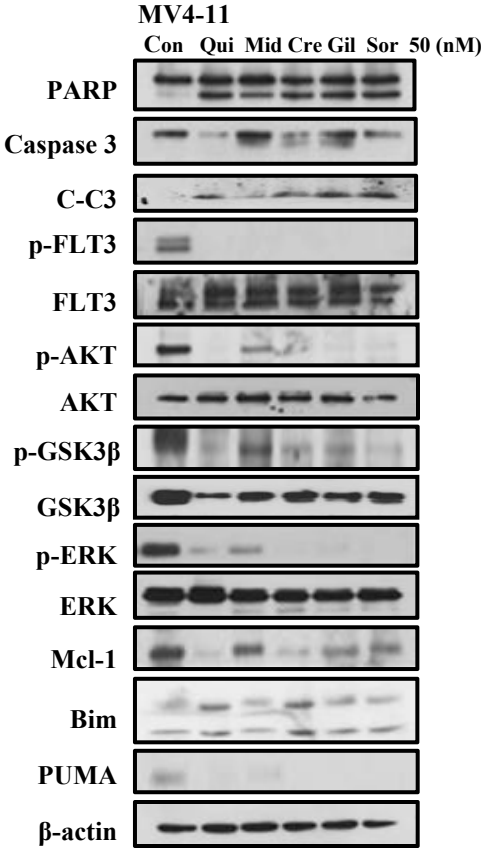

# Fig.2B

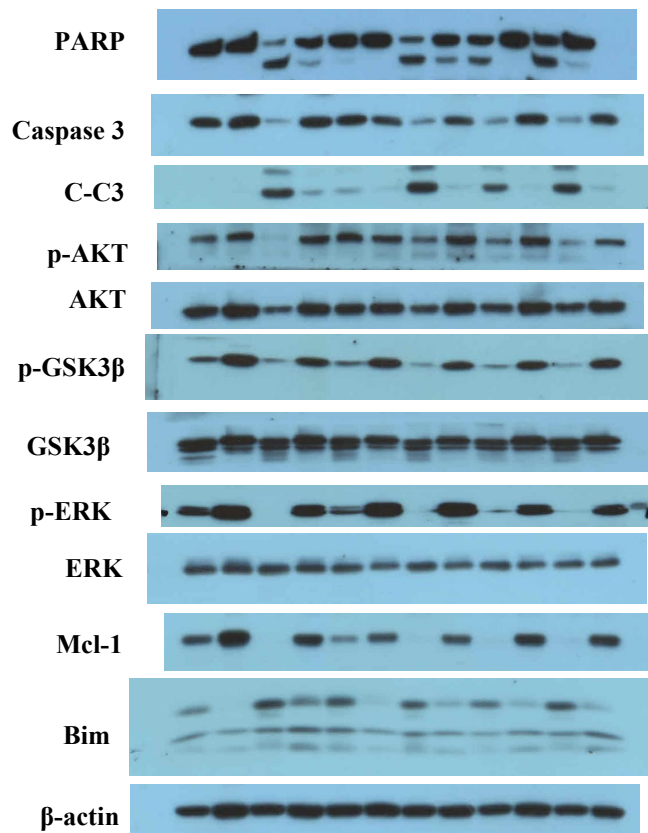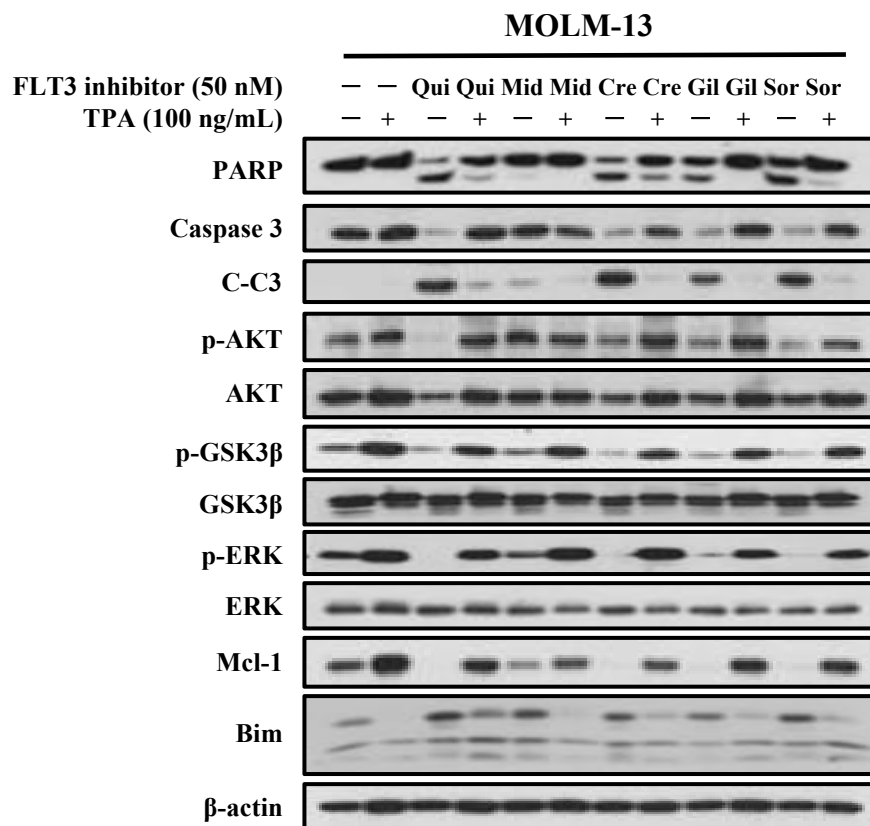

**Fig.2D**

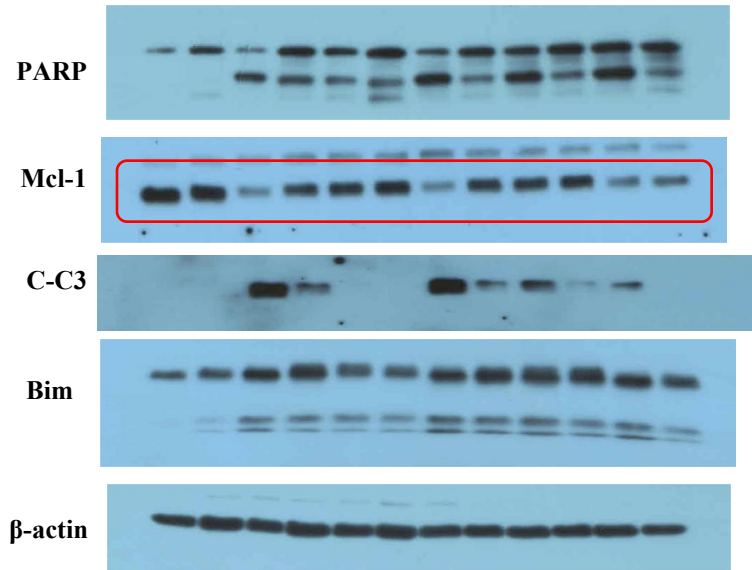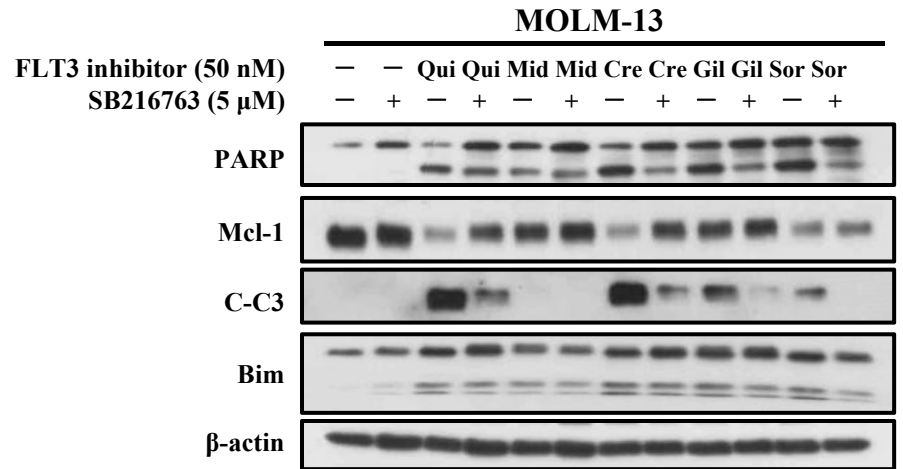

**Fig.2F**

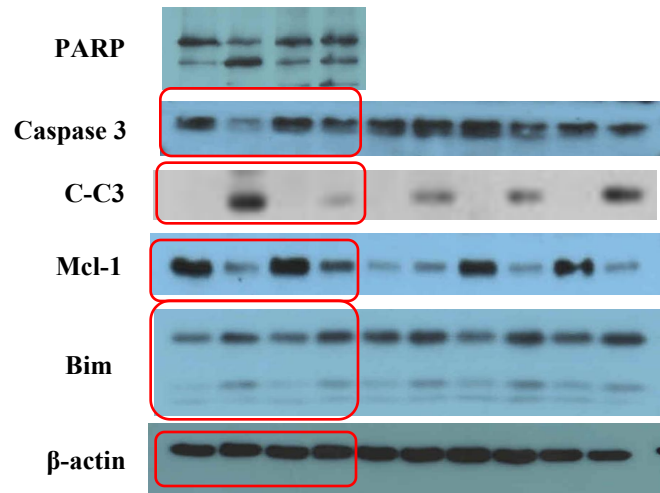

**F**

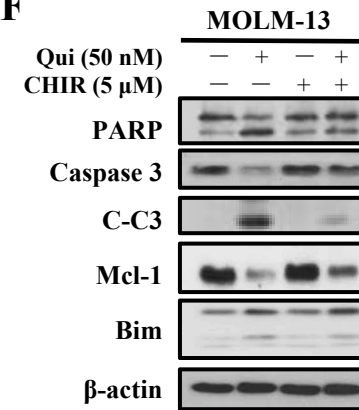

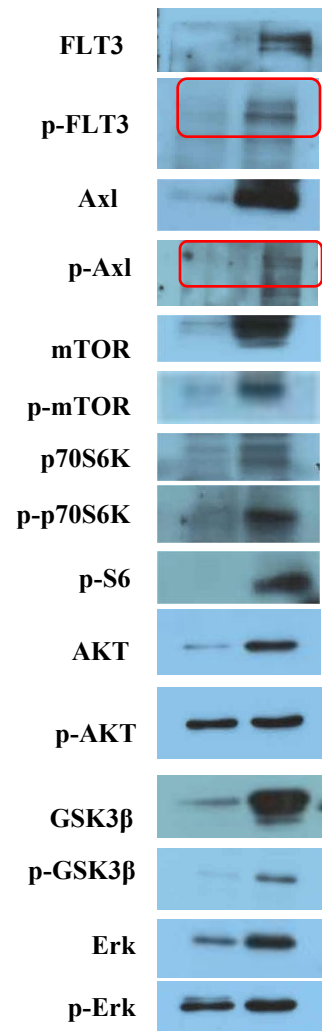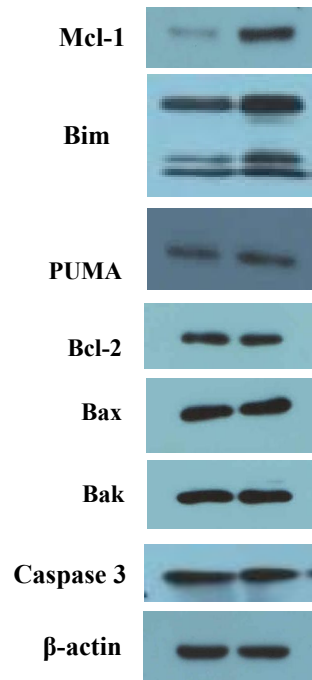

**Fig. 3F**

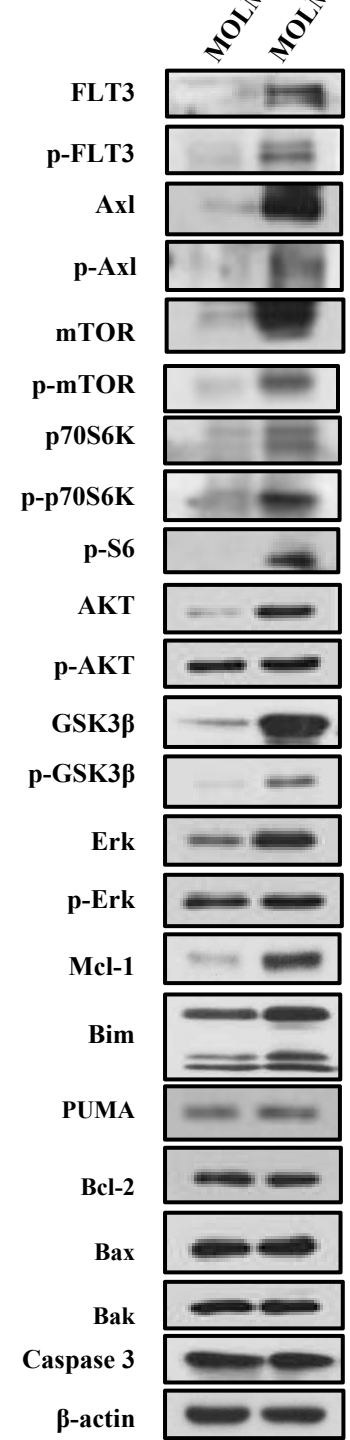

MOLM-13/sor  
Con Qui Mid Cre Gil Sor 50 (nM)

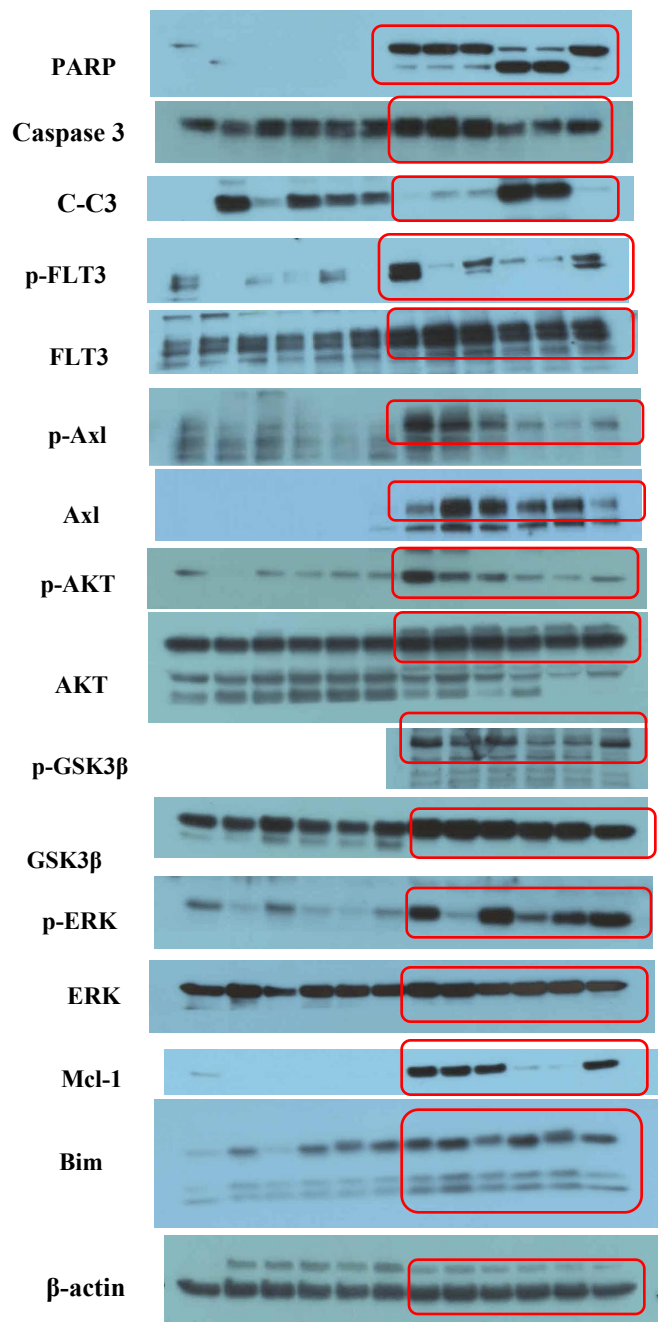

Fig.4C

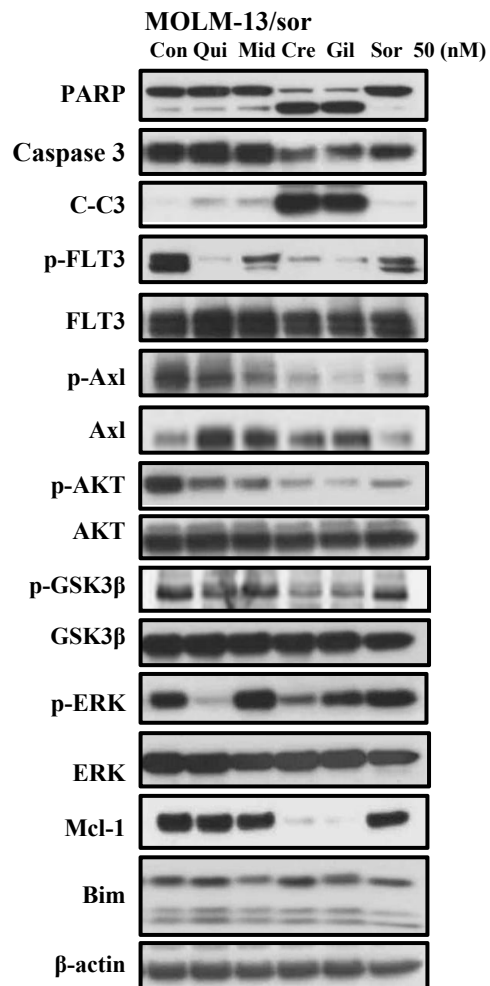

**Fig. 4E**

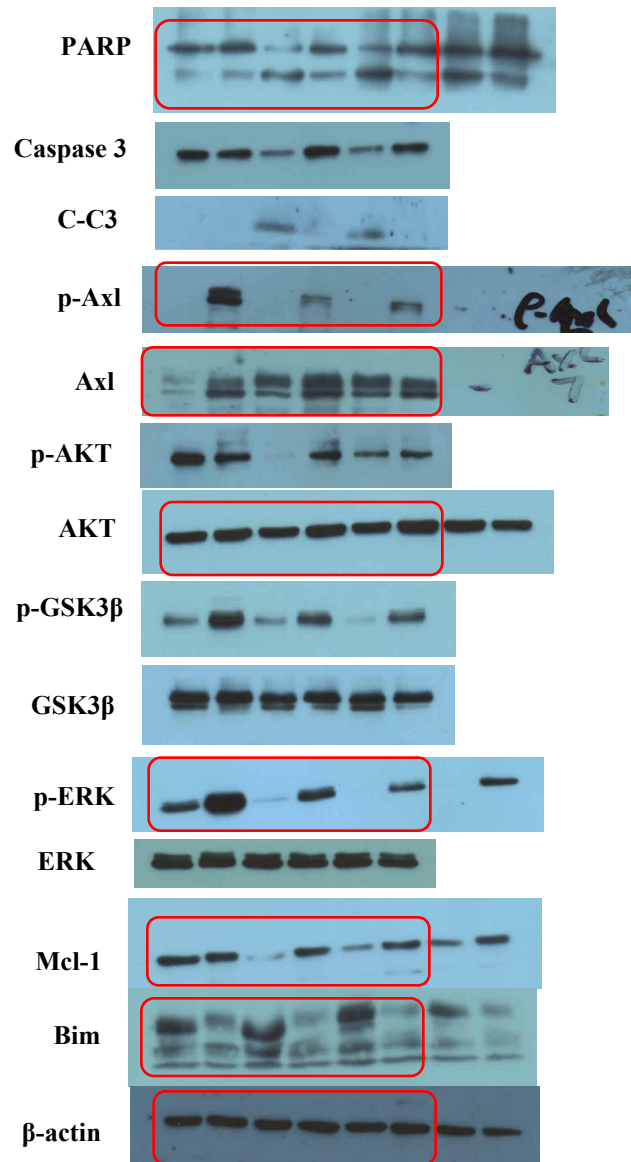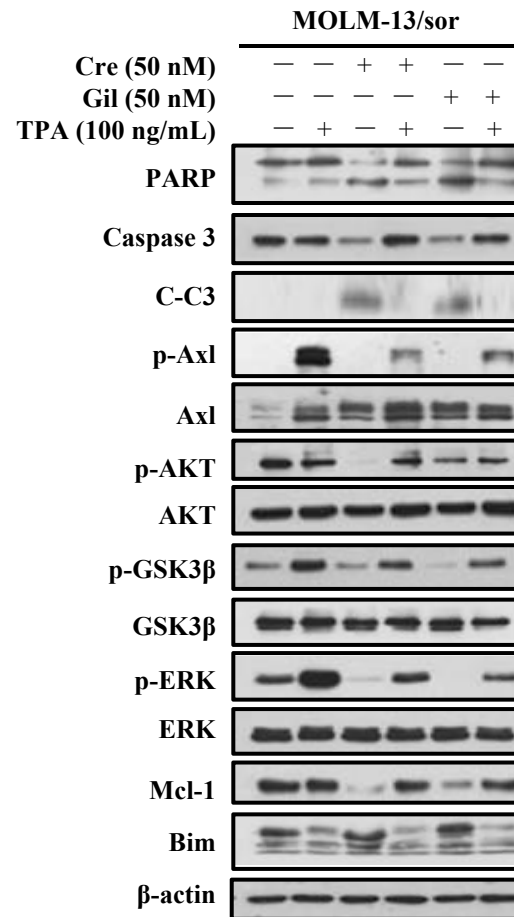



**Fig. 4G**

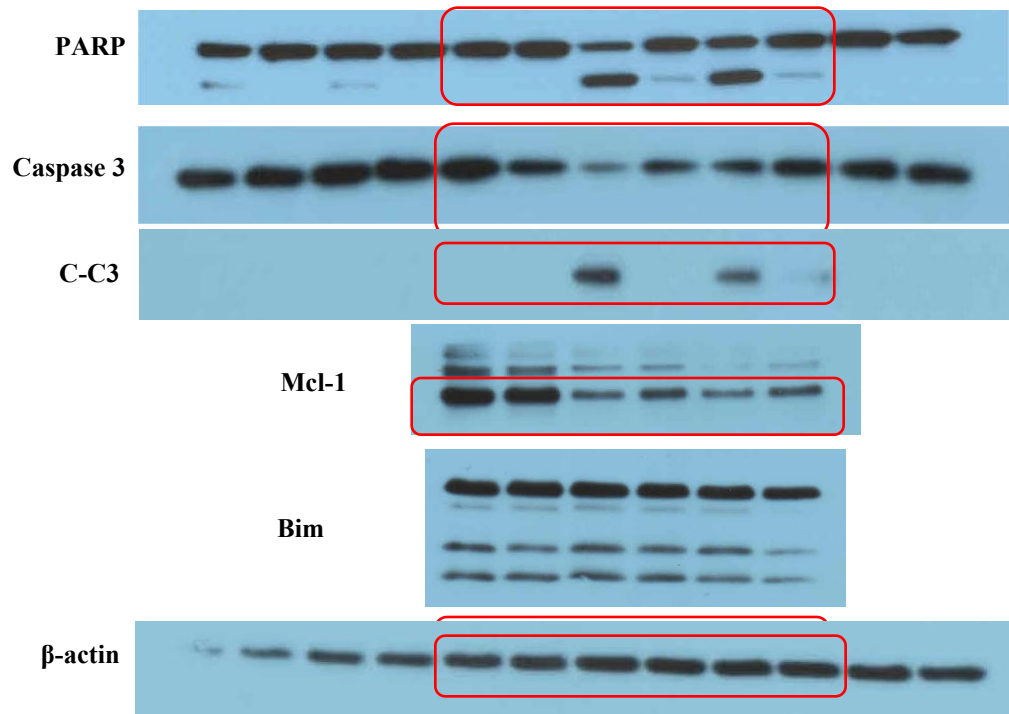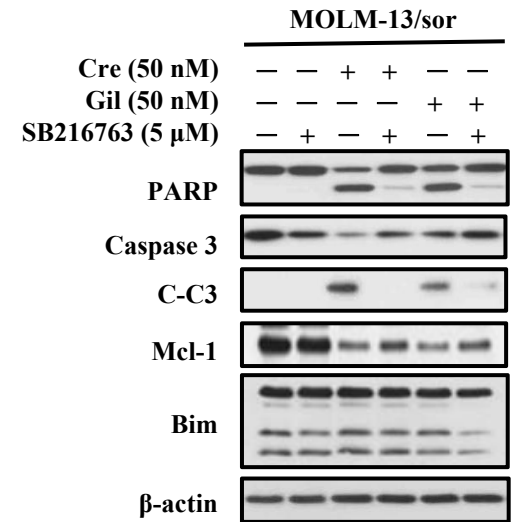

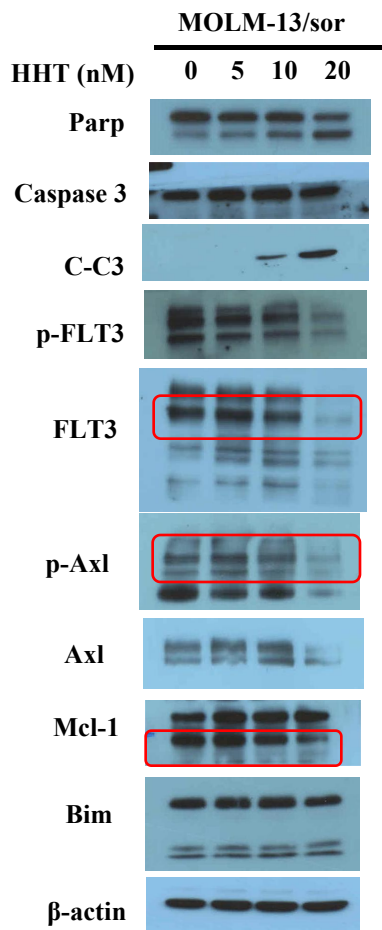

**Fig. 5B**

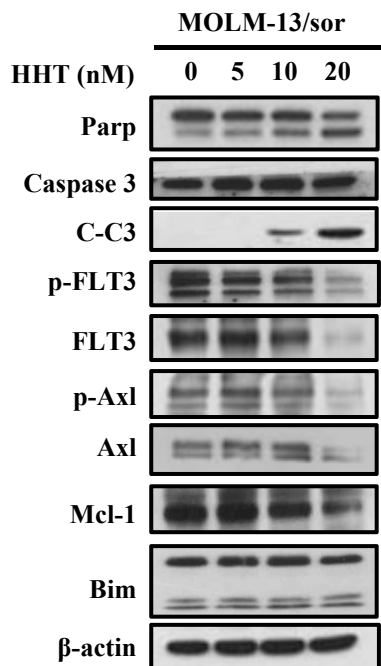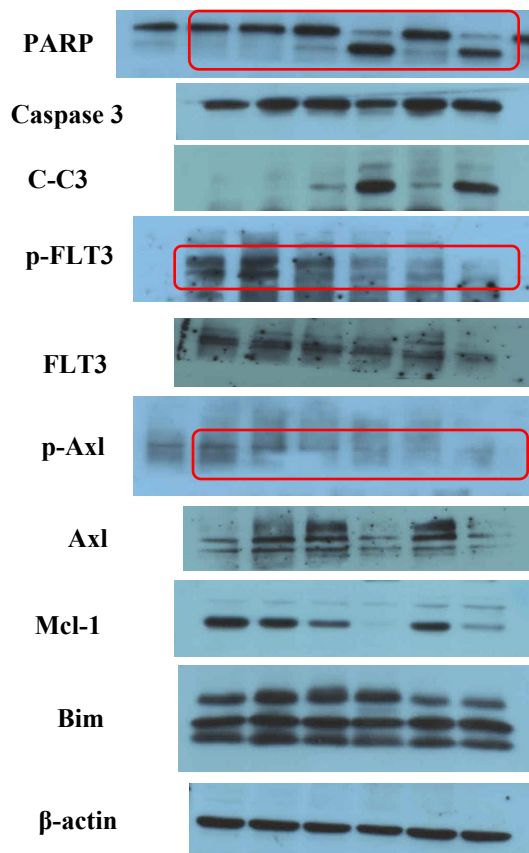

**Fig. 5D**

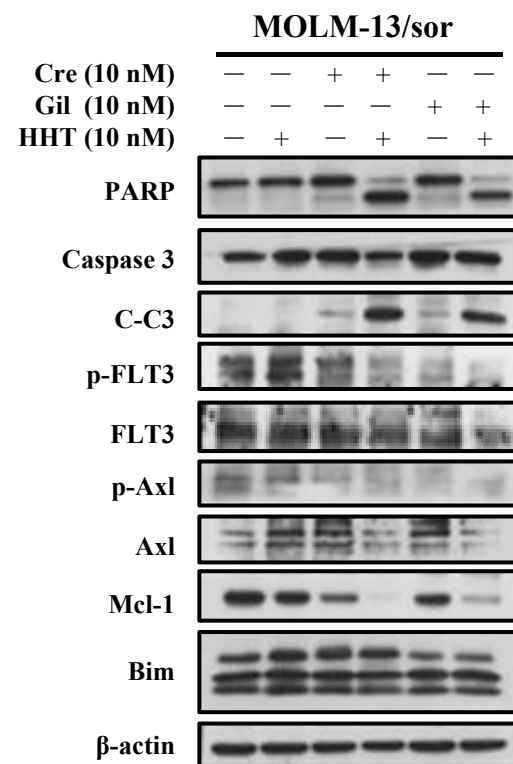

**Fig. 6C**

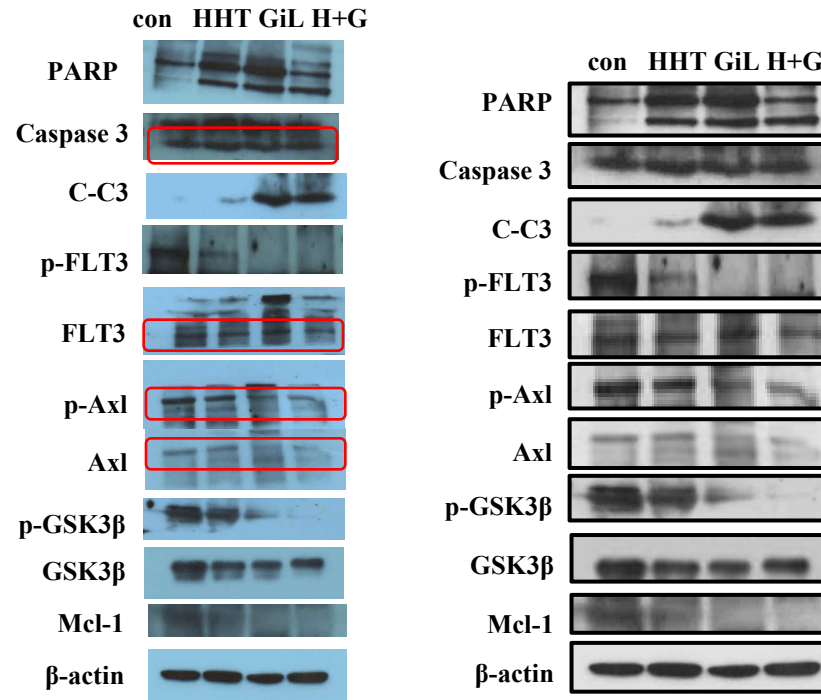



**Fig. S2B**

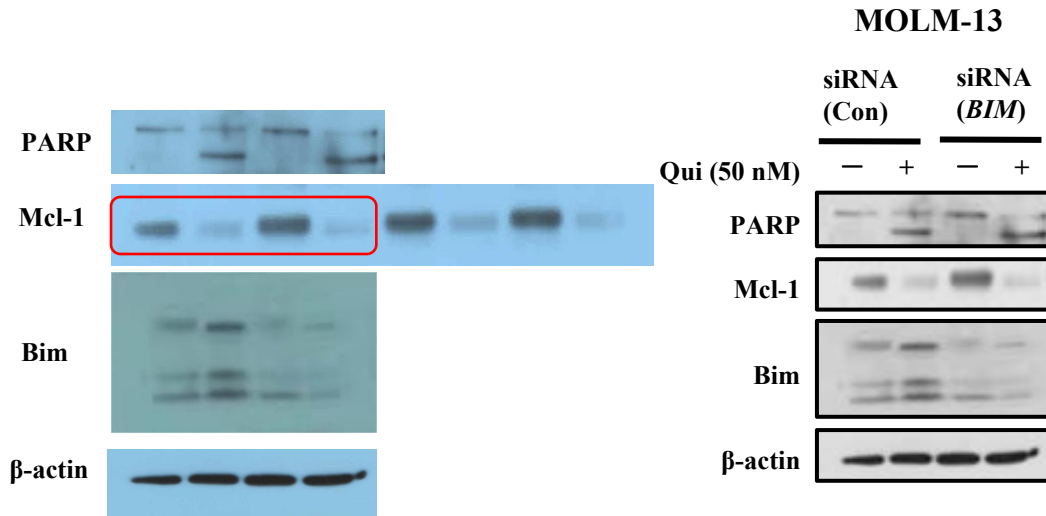

**Fig. S3A**

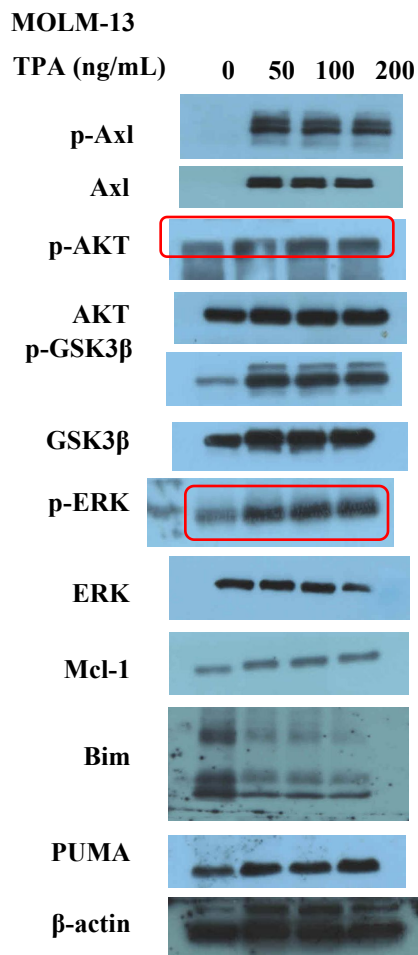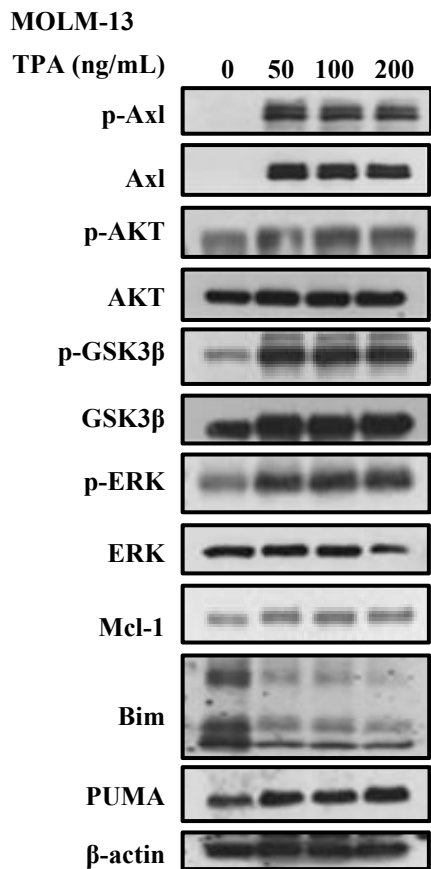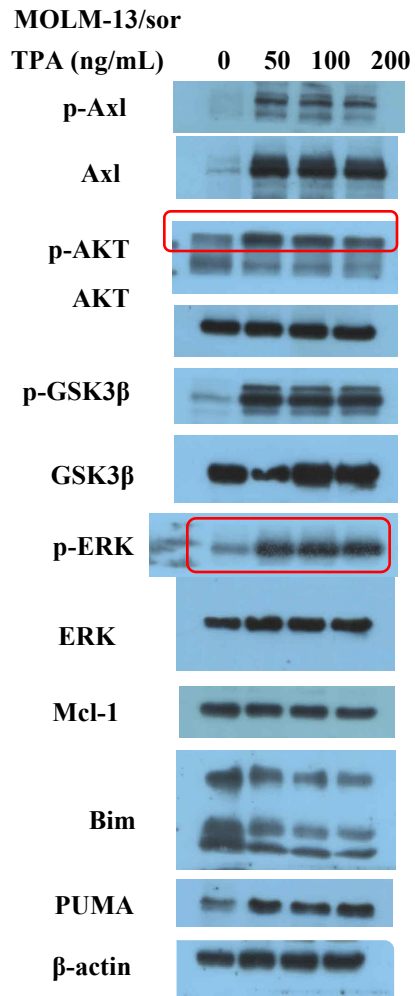

**Fig. S3B**

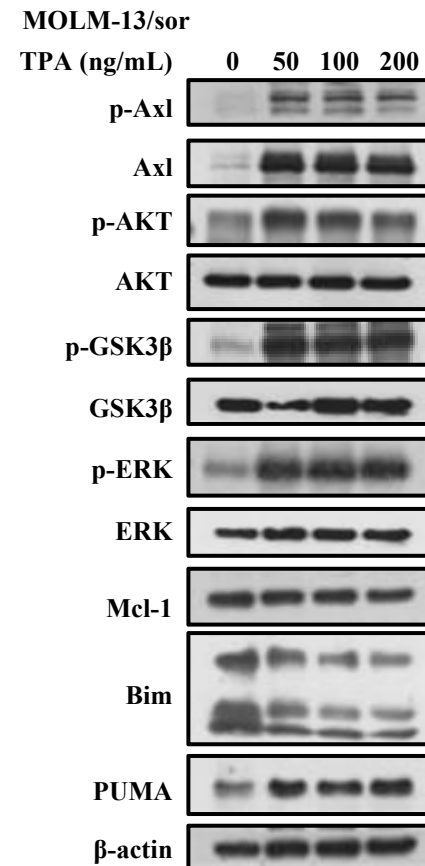

**Fig.S4B**

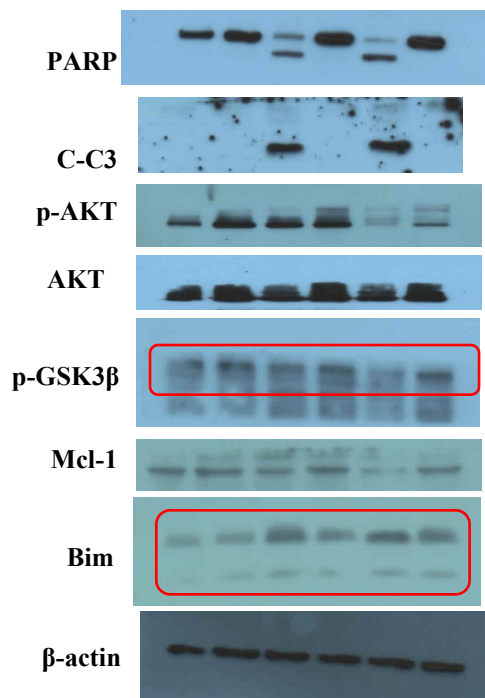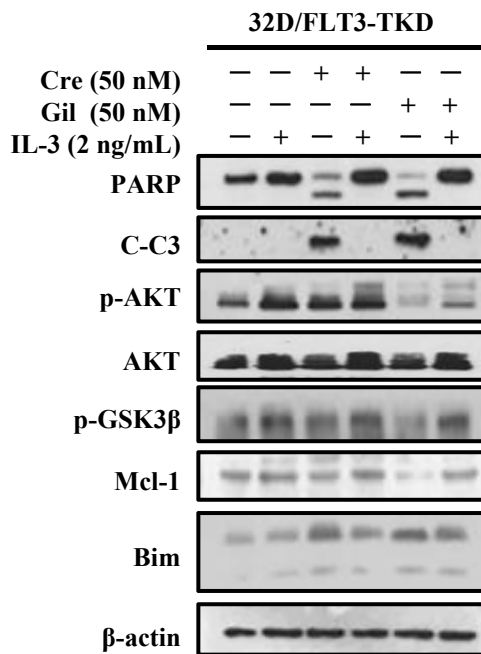

**Fig. S5B**

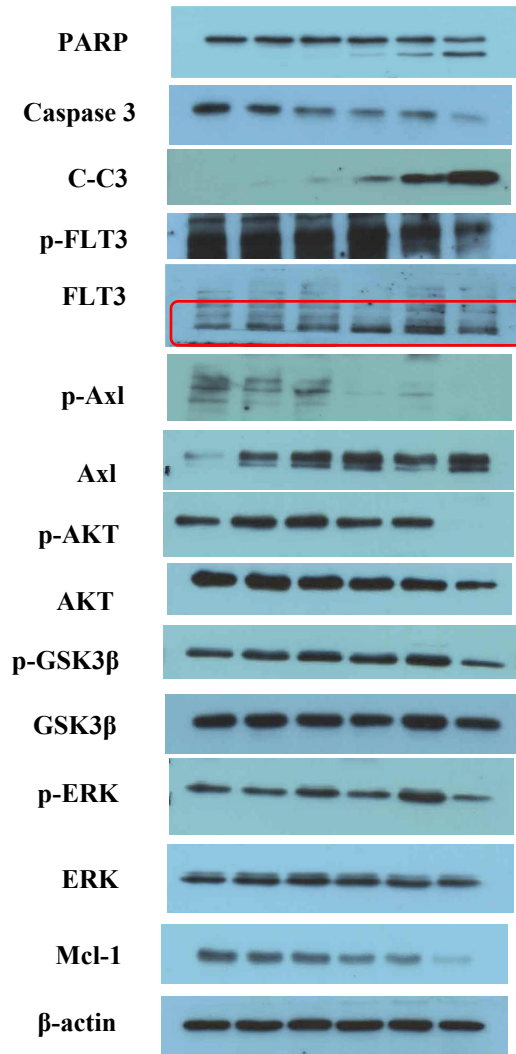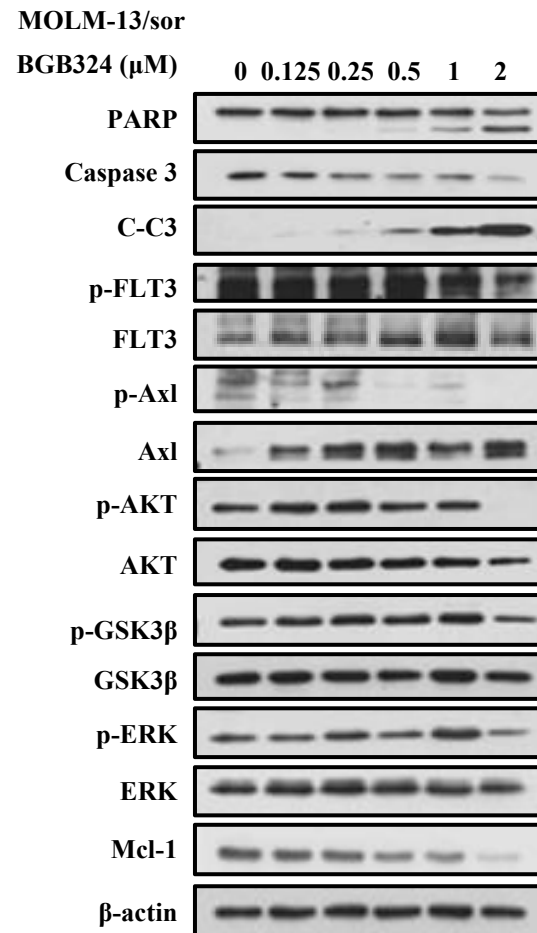



**Fig. S5D**

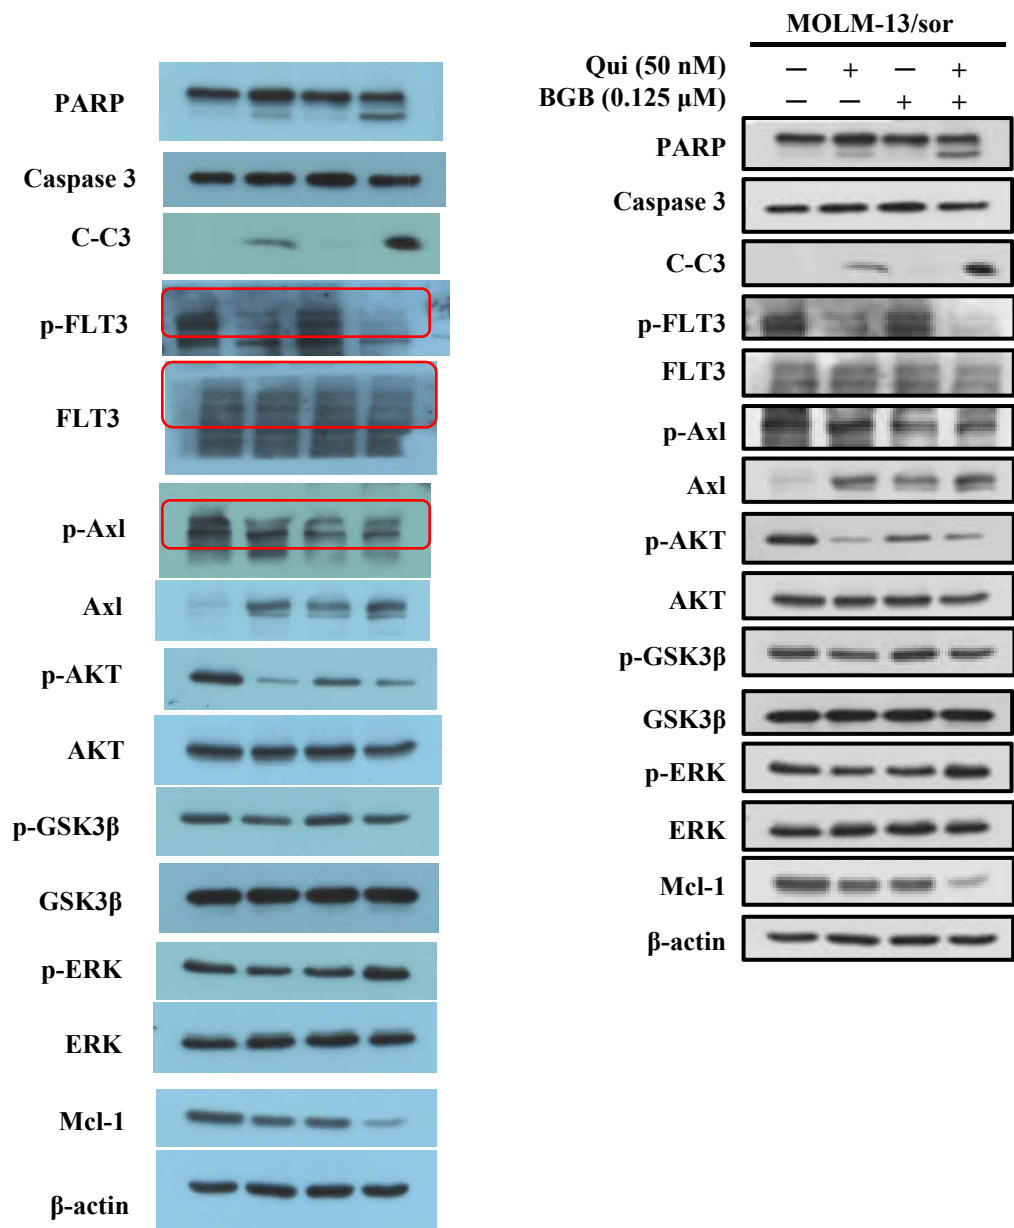

**Fig. S5E**

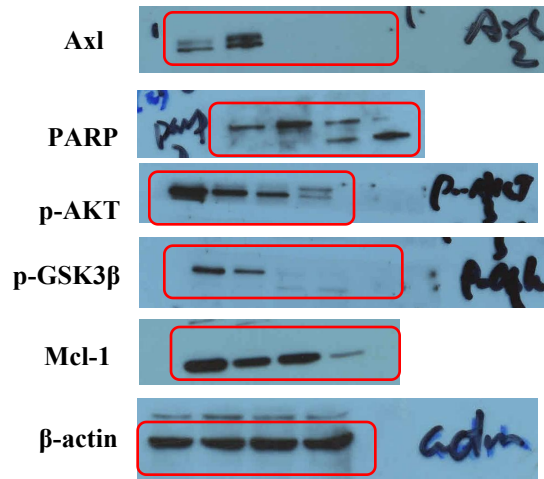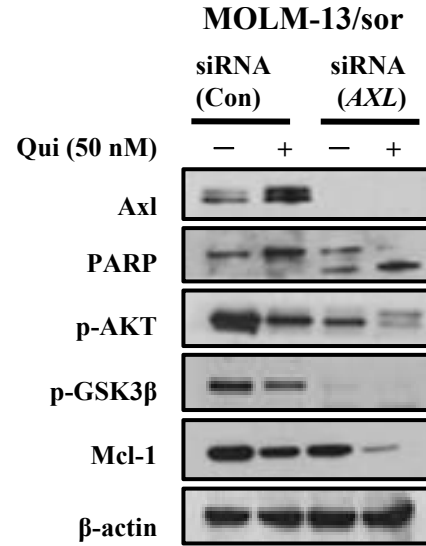

**Fig. S6A**

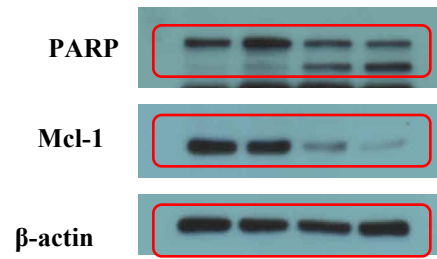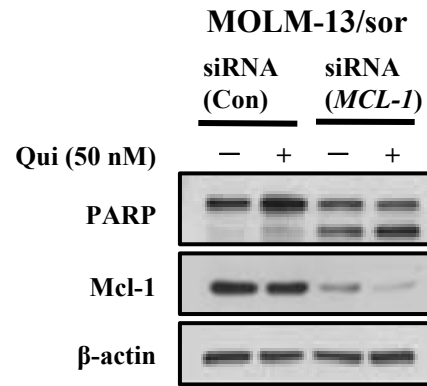

**Fig. S6B**

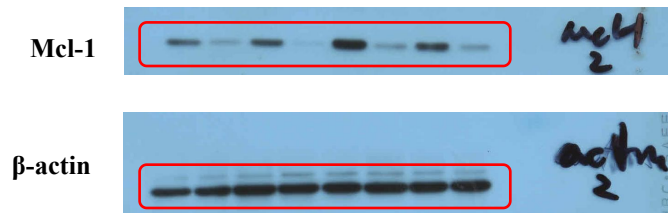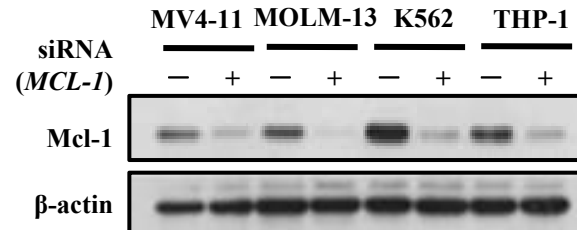

Supplement: 41420_2023_1317_MOESM3_ESM.pdf [file 41420_2023_1317_MOESM3_ESM.pdf]
