# Supplementary material for: The GSK3β/Mcl-1 axis is regulated by both FLT3-ITD and Axl and determines the apoptosis induction abilities of FLT3-ITD inhibitors
Source: PubMed Central journal article supplement (PMC9899255; doi:10.1038/s41420-023-01317-0), 2023-02-04
Supplement: 41420_2023_1317_MOESM2_ESM.pdf [file 41420_2023_1317_MOESM2_ESM.pdf]

**A**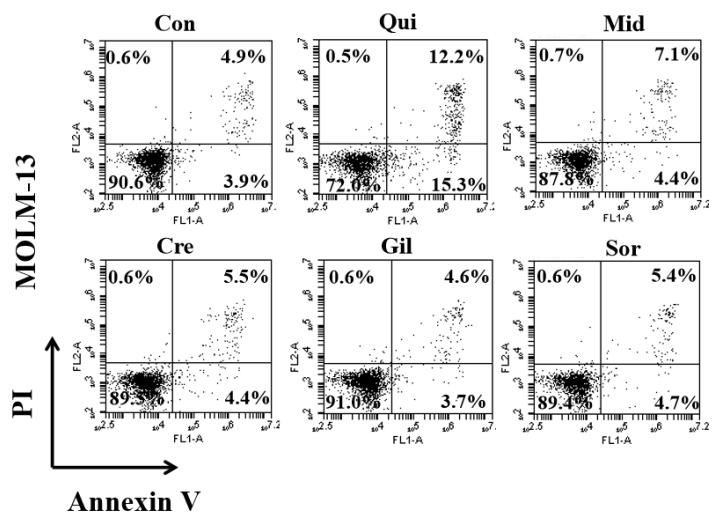**B**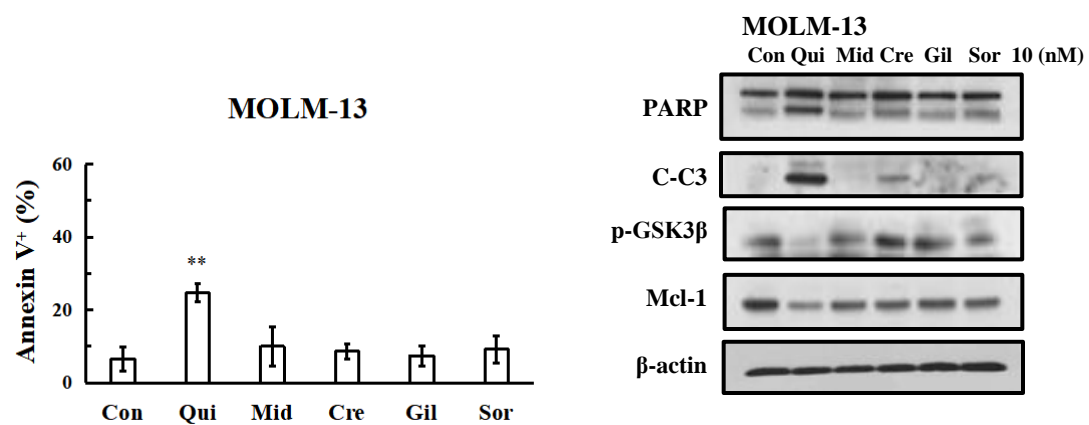**Fig.S1**

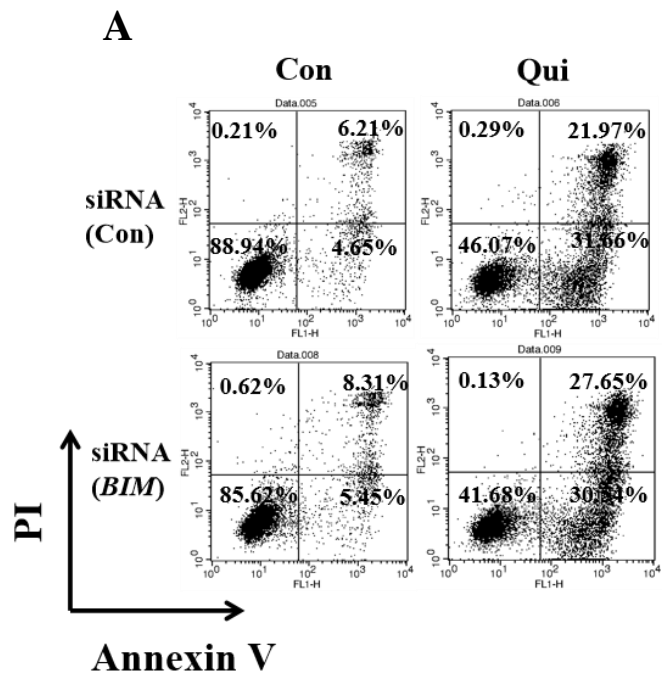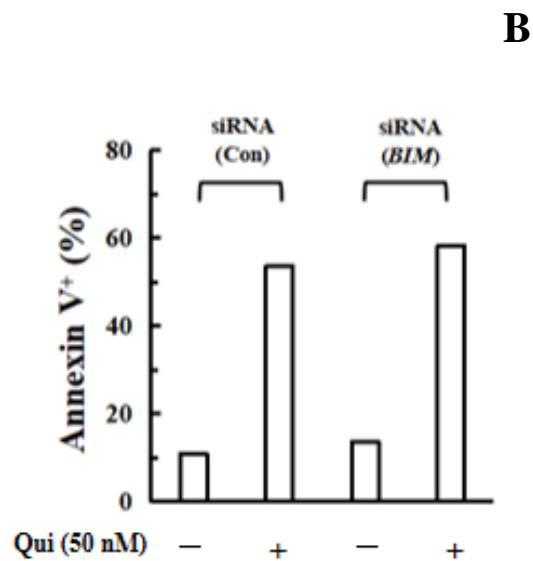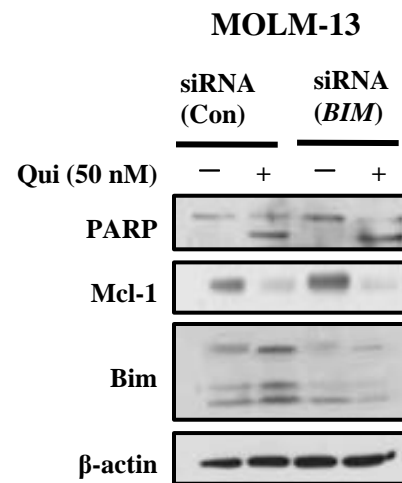

**Fig.S2**

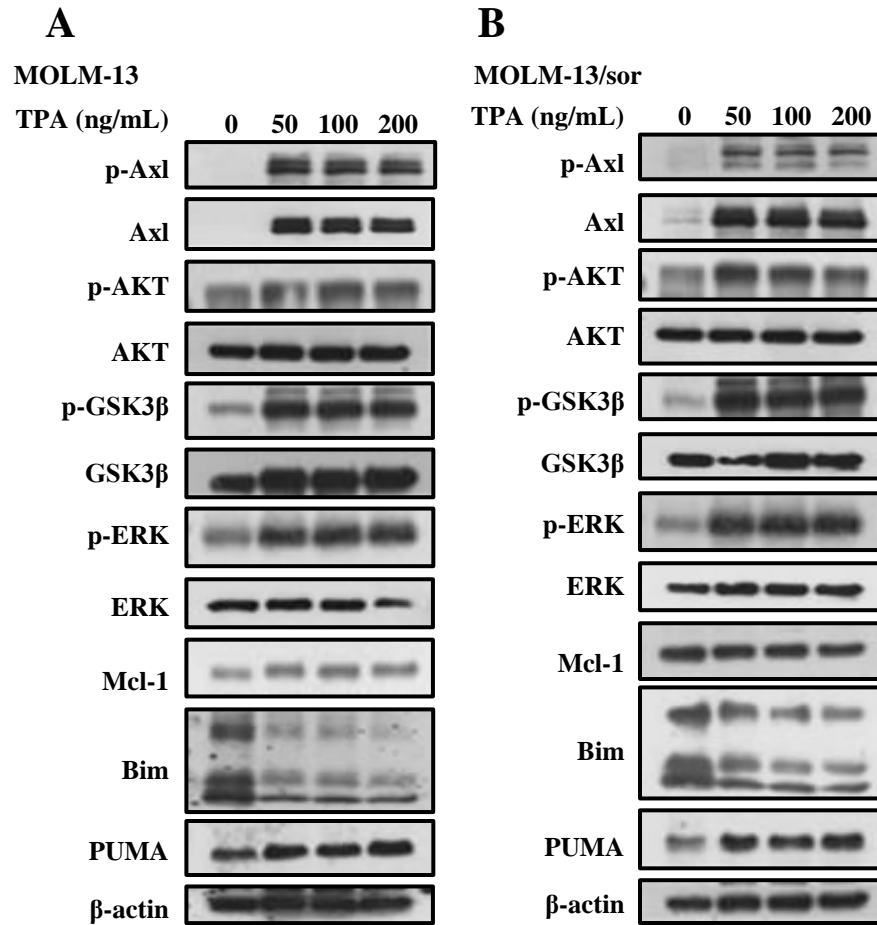

**Fig. S3**

**A**

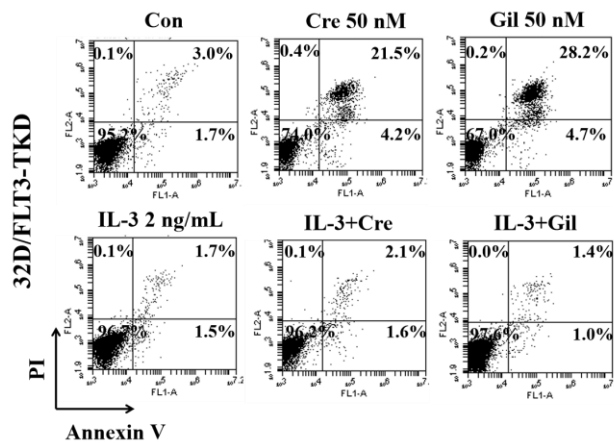

**B**

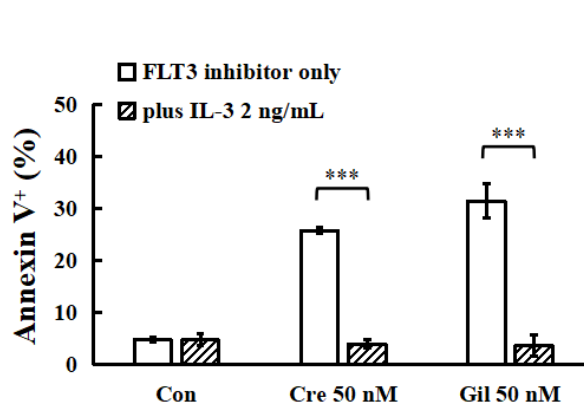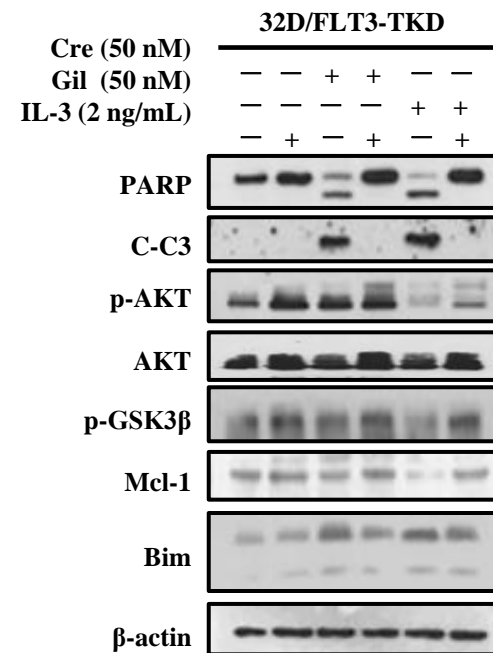

**C**

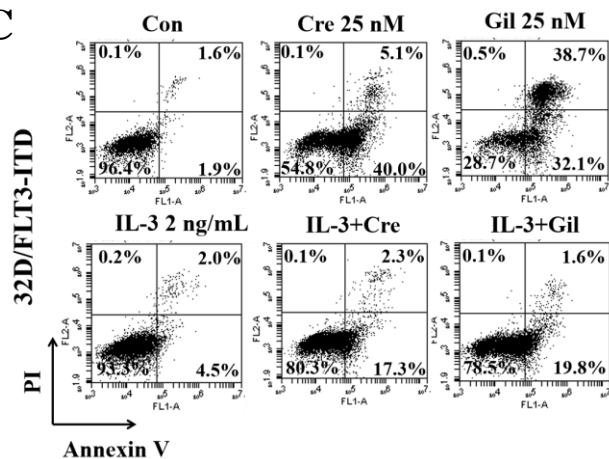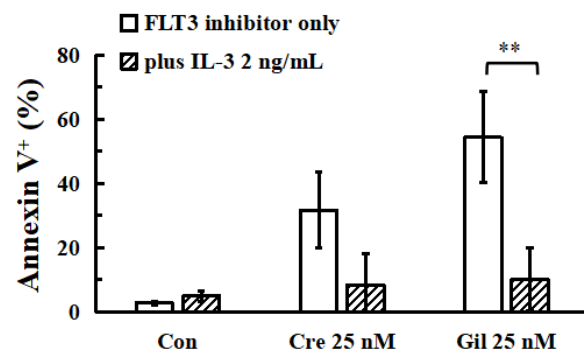

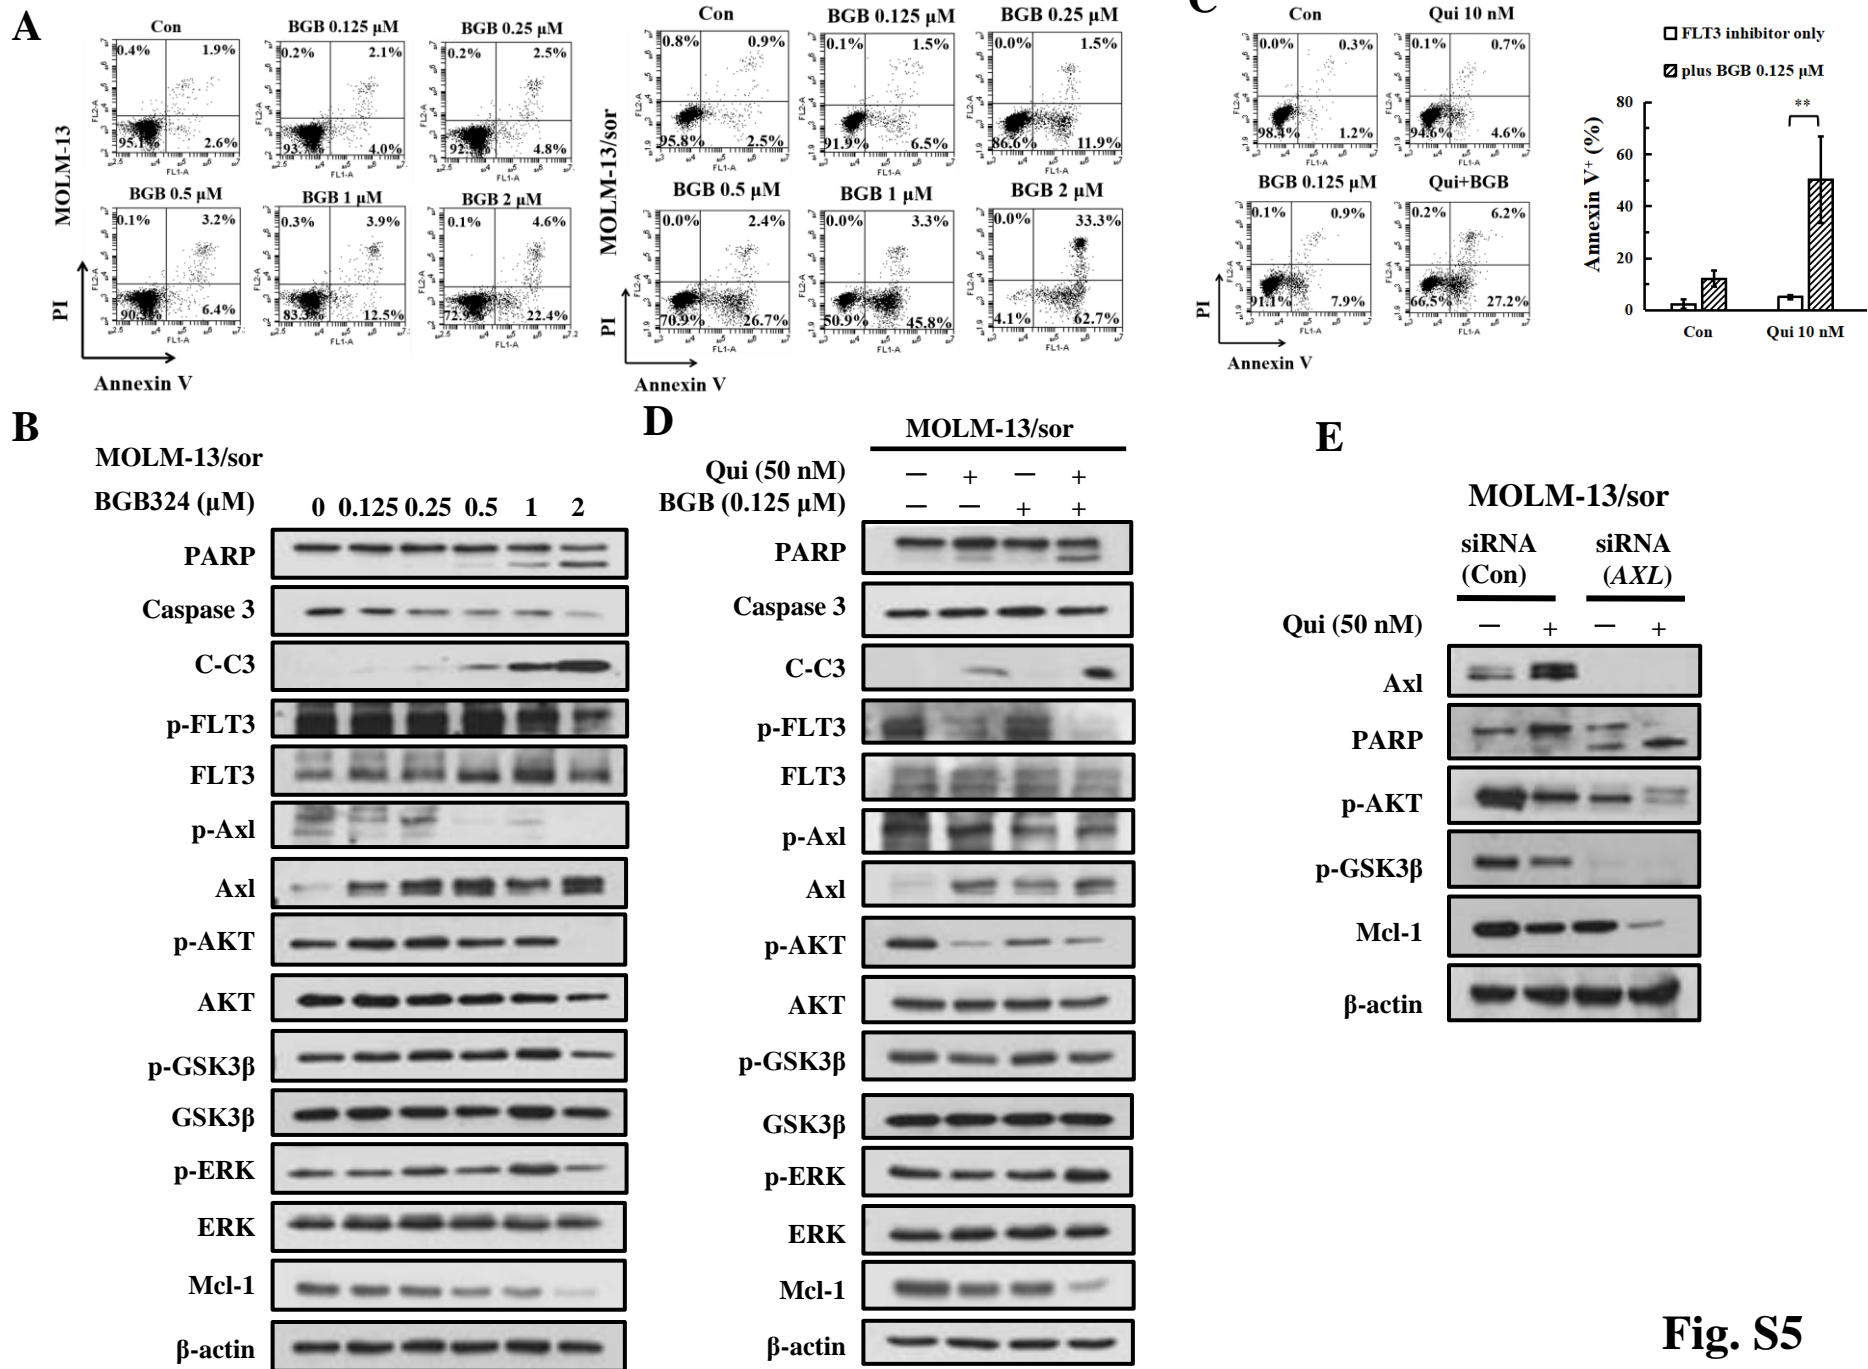

**Fig. S5**

**A**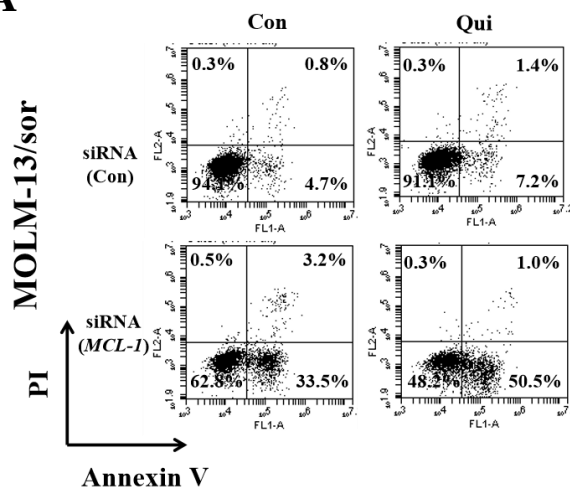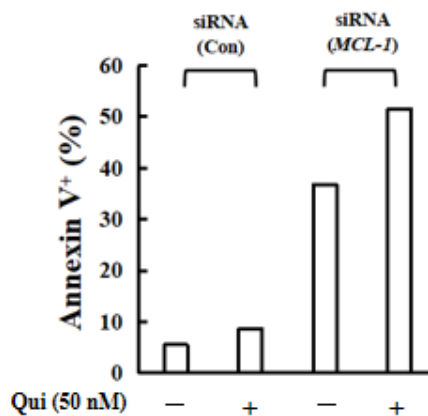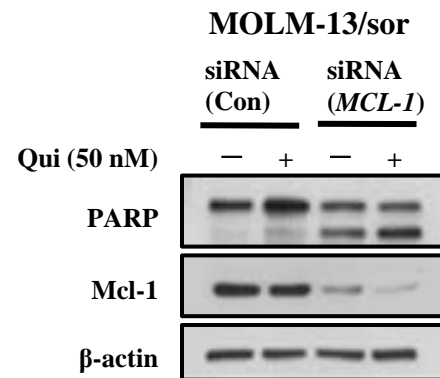**B**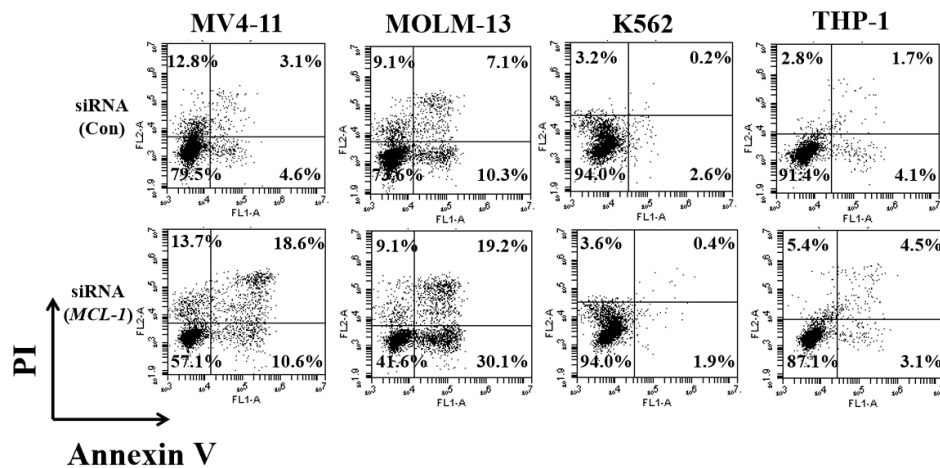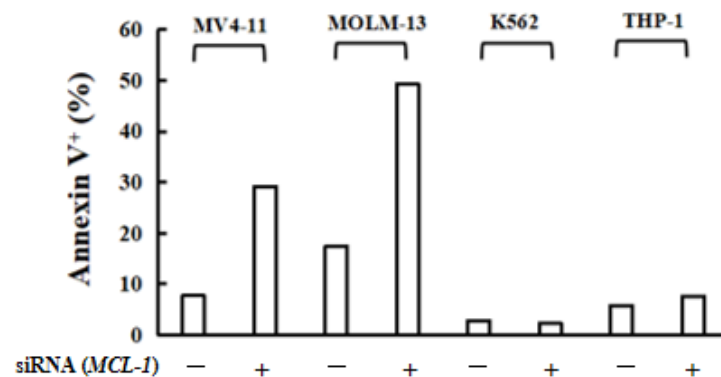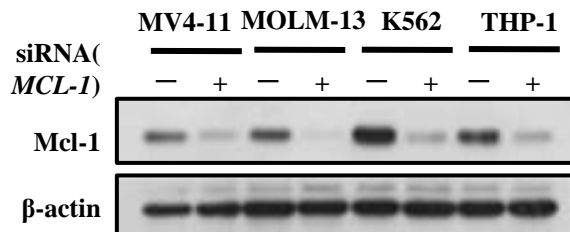**Fig. S6**
