# Supplementary material for: The GSK3β/Mcl-1 axis is regulated by both FLT3-ITD and Axl and determines the apoptosis induction abilities of FLT3-ITD inhibitors
Source: Springer Nature journal article supplement (doi:10.1038/s41420-023-01317-0), 2023-02-04
Supplement: MOESM1 [file 41420_2023_1317_MOESM1_ESM.pdf]

### Supplementary Figure legends

**Figure S1. Apoptosis induction of FLT3 inhibitors at 10 nM in MOLM-13 cells.** **A** Apoptosis detected by Annexin V/PI staining. **B** Protein levels measured by Western blot analysis. MOLM-13 cells were treated with each FLT3 inhibitor at 10 nM for 24 h.  $^{**}P < 0.01$  compared with the control group.

**Figure S2. Silencing *BIM* does not block quizartinib-induced apoptosis.** MOLM-13 cells were silenced with *BIM* siRNA and treated with quizartinib at 50 nM for 24 h. The apoptotic cells were detected by Annexin V/PI staining (**A**) and protein was detected by Western blot analysis (**B**).

**Figure S3. TPA stimulates multiple signaling pathways.** MOLM-13 and MOLM-13/sor cells were treated with TPA for 24 h and the protein levels were detected by Western blot analysis.

**Figure S4. IL-3 blocks crenolanib- and gilteritinib-induced apoptosis in 32D/FLT3-ITD and 32D/FLT3-TKD cells.** 32D/FLT3-ITD and 32D/FLT3-TKD cells were pretreated with or without 2 ng/mL IL-3 for 4 h and then with crenolanib and gilteritinib for another 24 h. Apoptosis was detected by Annexin V/PI staining (**A**, **C**) and protein was analyzed by Western blot (**B**).

**Figure S5. Axl inhibition overcomes quizartinib resistance.** **A** MOLM-13 and MOLM-13/sor cells were treated with the Axl inhibitor BGB324 for 24 h. Apoptosis was detected by Annexin V/PI staining. **B**, Protein regulation measured by Western blot of MOLM-13/sor cells treated with BGB324 for 24 h. **C** MOLM-13/sor cells were treated with 0.125  $\mu$ M BGB324 and 10 nM quizartinib for 24 h. Apoptosis detected by Annexin V/PI staining.  $^{**}P < 0.01$  compared with the FLT3 inhibitor group. **D** Protein regulation of MOLM-13/sor cells treated with BGB324 and quizartinib for 24 h. **E** Axl was silenced with *AXL* siRNA in MOLM-12/sor cells that were subsequently treated with quizartinib. PARP cleavage was detected by Western blot.

**Figure S6. Silencing *MCL1* induces apoptosis in MOLM-13, MOLM-13/sor, and MV4-11 cells.** **A** MOLM-13/sor cells were silenced with *MCL1* siRNA and treated with 50 nM quizartinib. **B** MOLM-13, MV4-11, THP-1, and K562 cells were silenced with *MCL1* siRNA. Apoptotic cells were detected with Annexin V/PI staining and the protein levels were detected by Western blot analysis.
